# Supplementary material for: Detecting the Effects of Extreme Events on Estuarine Suspended Particulate Matter Using Satellite Remote Sensing (Scheldt Estuary): Challenges and Opportunities
Source: MDPI journal article supplement (doi:10.3390/rs15030670), 2023-01-23
Supplement: s1 [file s1]

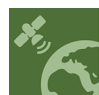

# Detecting the Effects of Extreme Events on Estuarine Suspended Particulate Matter Using Satellite Remote Sensing (Scheldt Estuary): Challenges and Opportunities

Juliana Tavora <sup>1,\*</sup>, Mhd. Suhyb Salama <sup>1</sup>, Marloes Penning de Vries <sup>1</sup>, Chris M. Mannaerts <sup>1</sup>, and Daphne van der Wal <sup>1,2</sup>

<sup>1</sup> Faculty of Geo-Information Science and Earth Observation (ITC), University of Twente, P.O. Box 217, 7500 AE Enschede, The Netherlands; s.salama@utwente.nl (M.S.S.); m.j.m.penningdevries@utwente.nl (M.P.d.V.); c.m.m.mannaerts@utwente.nl (C.M.M.); d.vanderwal@utwente.nl (D.v.d.W.)

<sup>2</sup> NIOZ Royal Netherlands Institute for Sea Research, Dept of Estuarine and Delta Systems, P.O. 140, 4400 AC Yerseke, The Netherlands

\* Correspondence: j.tavora@utwente.nl

Table S1: Overview of in situ data.

| Parameter            | Unit                            | Source | Station                      | Sampling frequency   | Period of data availability | SPM range   |
|----------------------|---------------------------------|--------|------------------------------|----------------------|-----------------------------|-------------|
| SPM                  | g.m <sup>-3</sup>               | RWS    | <i>Hansweert Geul</i>        | Bi-weekly to Monthly | 1984 – 2018                 | 0.3 – 150.0 |
|                      |                                 |        | <i>Hansweert 28</i>          |                      | 1984 – 1990                 | 0.0 – 254.0 |
|                      |                                 |        | <i>Hoedekenskerke 4</i>      |                      | 1988 – 2016                 | 3.0 – 383.0 |
|                      |                                 |        | <i>Pas van Terneuzen 10</i>  |                      | 1984 – 1990                 | 0.0 – 187.0 |
|                      |                                 |        | <i>Schaar van Ouden Doel</i> |                      | 1984 – 2018                 | 2.6 – 620.0 |
|                      |                                 |        | <i>Terneuzen 20</i>          |                      | 1984 – 2018                 | 4.0 – 340.0 |
|                      |                                 |        | <i>Vlissingen SSVH</i>       |                      | 1984 – 2018                 | 0.0 – 378.0 |
|                      |                                 |        | <i>Zuidergat 49</i>          |                      | 1984 – 1990                 | 2.0 – 186.0 |
| SPM                  | g.m <sup>-3</sup>               | NIOZ   | #1, 2, 3, 4, 13, 14, 16, 17  | Bi-weekly            | 1995 – 2004                 | 4.1 – 509.2 |
| River discharge      | m <sup>3</sup> .s <sup>-1</sup> | RWS    | <i>Schaar van Ouden Doel</i> | Daily                | 1984 – 2020                 |             |
| Wind speed/direction | m.s <sup>-1</sup>               | KNMI   | <i>Vlissingen – 310</i>      | Hourly               | 1984 – 2020                 |             |
| Water level          | m                               | RWS    | <i>Hansweert geul</i>        | 10min                | 1984 – 2020                 |             |

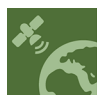

Table S2: Coefficients A and C of SPM algorithm. Original narrow-band and band-weighted coefficients (A and C; Equation 1 in main text) in the used SPM algorithm for each satellite sensor. Acronyms for satellite sensors are: TM (Thematic Mapper), ETM+ (Enhanced Thematic Mapper), and OLI (Operational Land Imager)

| Satellite (sensor) | Central Band<br>[nm] | Narrow-band            |              | Band-weighted          |              |
|--------------------|----------------------|------------------------|--------------|------------------------|--------------|
|                    |                      | A [g.m <sup>-3</sup> ] | C [unitless] | A [g.m <sup>-3</sup> ] | C [unitless] |
| Landsat-5 (TM)     | 660                  | 327.840                | 0.1708       | 331.589                | 0.1713       |
|                    | 839                  | 2518.700               | 0.2105       | 2250.000               | 0.2093       |
| Landsat-7 (ETM+)   | 661                  | 333.728                | 0.1712       | 328.266                | 0.1710       |
|                    | 835                  | 2379.770               | 0.2103       | 2270.300               | 0.2092       |
| Landsat-8 (OLI)    | 655                  | 289.290                | 0.1686       | 304.3023               | 0.1682       |
|                    | 865                  | 2971.93                | 0.2115       | 2974.400               | 0.2115       |



Table S3: Match-up information data. In situ data is provided by RWS and by NIOZ. Refer to main text for full SPM data description. L5 is Landsat-5, L7 is Landsat-7, and L8 is Landsat-8.

| Date<br>[yyyy.mm.dd] | Sampling time<br>[UTC HH:mm:ss] |          | Satellite | stations                  | SPM in-situ<br>[g.m <sup>-3</sup> ] |
|----------------------|---------------------------------|----------|-----------|---------------------------|-------------------------------------|
|                      | satellite overpass              | in situ  |           |                           |                                     |
| 1984.08.20           | 10:09:57                        | 10:40:00 | L5        | RWS Hansweert Geul        | 42                                  |
|                      |                                 | 10:12:00 | L5        | RWS Hansweert 28          | 19                                  |
|                      |                                 | 09:10:00 | L5        | RWS Pas van Terneuzen 10  | 11                                  |
|                      |                                 | 11:09:00 | L5        | RWS Zuidergat 49          | 23                                  |
| 1986.09.20           | 09:54:14                        | 10:00:00 | L5        | RWS Vlissingen SSVH       | 8                                   |
| 1987.04.23           | 10:03:13                        | 11:00:00 | L5        | RWS Vlissingen SSVH       | 4                                   |
| 1988.04.25           | 10:10:12                        | 09:10:00 | L5        | RWS Hansweert 28          | 9                                   |
|                      |                                 | 09:40:00 | L5        | RWS Pas van Terneuzen 10  | 15                                  |
|                      |                                 | 10:00:00 | L5        | RWS Pas van Terneuzen 10  | 18                                  |
|                      |                                 | 10:25:00 | L5        | RWS Vlissingen SSVH       | 22                                  |
| 1997.05.13           | 10:02:08                        | 09:10:00 | L5        | RWS Terneuzen 20          | 45                                  |
|                      |                                 | 10:40:00 | L5        | RWS Terneuzen 20          | 16                                  |
| 1998.12.17           | 10:18:58                        | 10:54:00 | L5        | NIOZ #16                  | 75.1                                |
|                      |                                 | 10:23:00 | L5        | NIOZ #17                  | 97.48                               |
| 1999.04.01           | 10:12:32                        | 09:35:00 | L5        | RWS Schaar van Ouden Doel | 50                                  |
| 1999.05.03           | 10:12:31                        | 10:16:00 | L5        | RWS Schaar van Ouden Doel | 43                                  |
| 2001.01.23           | 10:19:55                        | 10:54:00 | L5        | NIOZ #17                  | 95.75                               |
| 2005.09.08           | 10:21:58                        | 09:52:00 | L5        | RWS Schaar van Ouden Doel | 99                                  |
| 1999.10.18           | 10:26:46                        | 11:04:00 | L7        | RWS Hoedekenskerke 4      | 28                                  |
| 1999.11.03           | 10:26:43                        | 10:31:00 | L7        | NIOZ #2                   | 23.61                               |
|                      |                                 | 10:50:00 | L7        | NIOZ #3                   | 15.01                               |
|                      |                                 | 10:00:00 | L7        | NIOZ #1                   | 63.59                               |
| 2003.03.19           | 10:22:33                        | 09:35:00 | L7        | NIOZ #2                   | 18.83                               |
|                      |                                 | 09:50:00 | L7        | NIOZ #3                   | 23.6                                |
|                      |                                 | 10:40:00 | L7        | NIOZ #4                   | 35.48                               |
| 2014.09.08           | 10:40:10                        | 11:23:00 | L8        | RWS Terneuzen 20          | 147                                 |
|                      |                                 | 10:06:00 | L8        | RWS Vlissingen SSVH       | 12                                  |

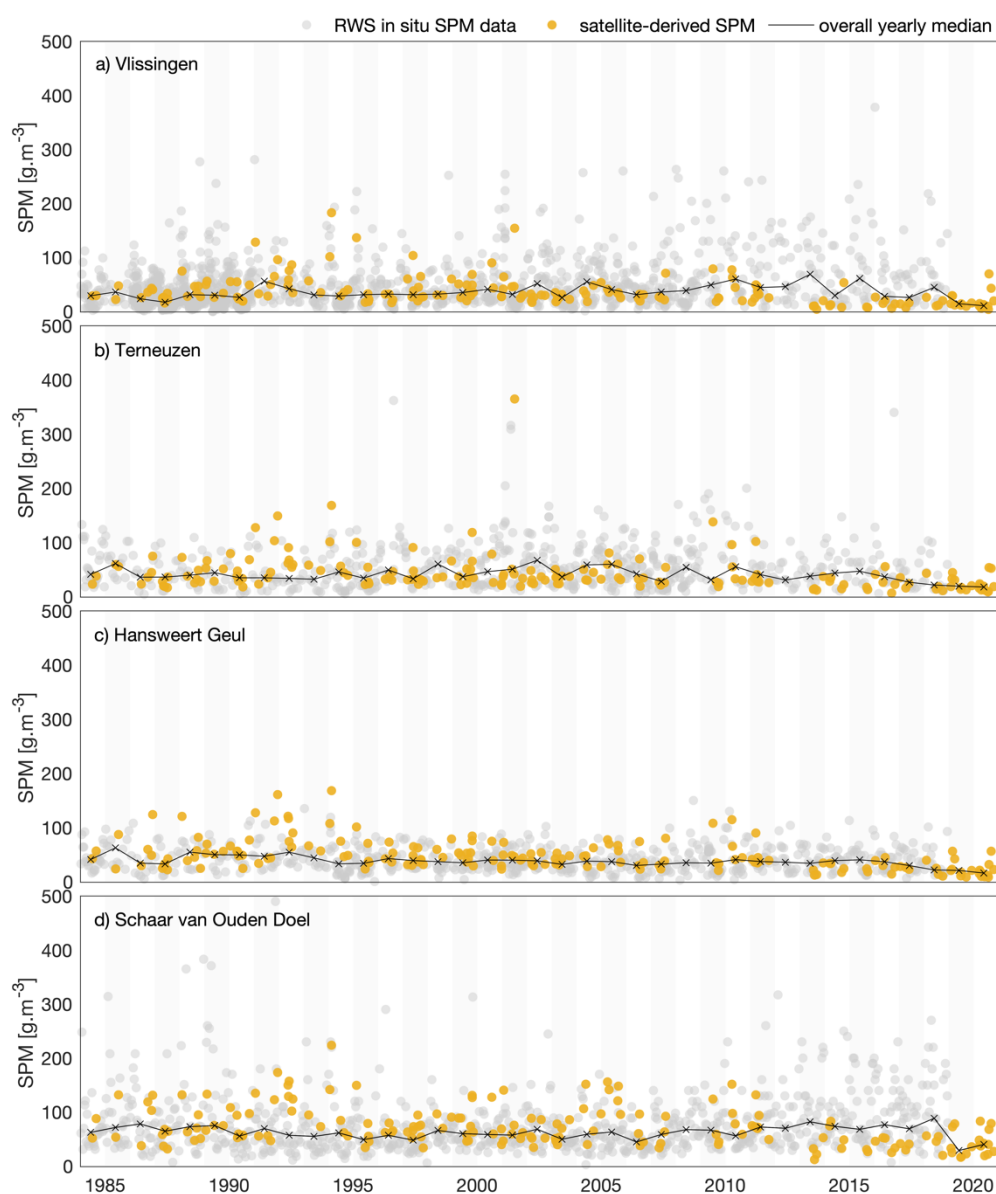

Figure S1. Interannual variability of SPM from in situ RWS datasets (grey scatter) and satellite-derived SPM (yellow scatter) relative to each region delimited in Figure 1 (main text). Overall yearly median is represented by black line.

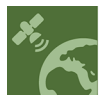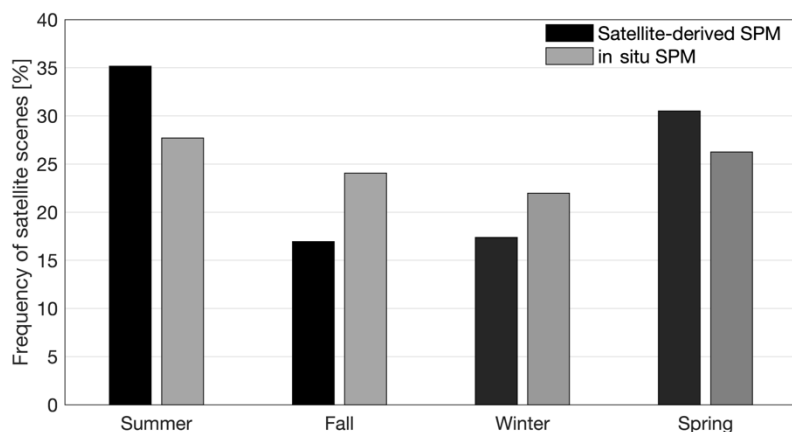

Figure S2A. Distribution of total number of satellite scenes and in situ SPM per classes of boreal season

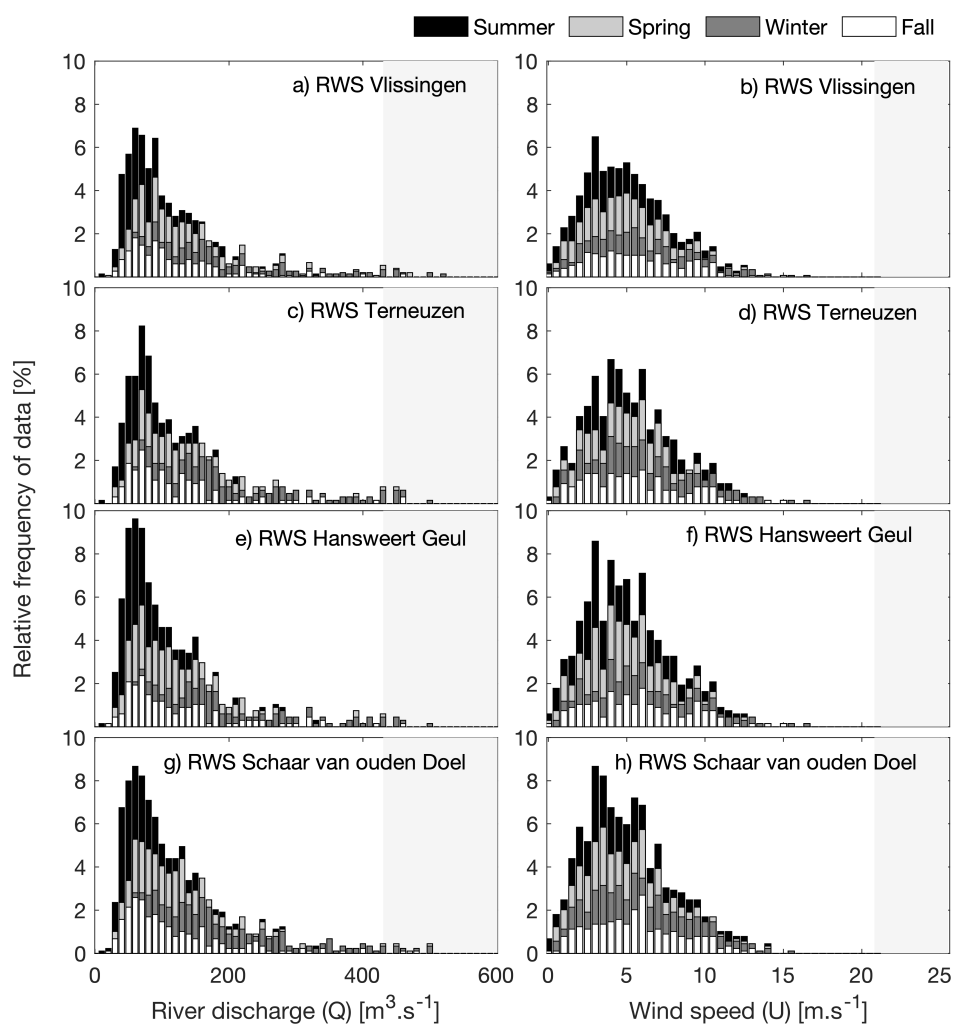

Figure S2B. Distribution of total number of in-situ SPM data (from in situ data RWS) per classes of boreal season (a), (c), (e), (g), daily river discharge and (b), (d), (f), (h), daily wind speed. Shared areas mark the threshold for extreme events.

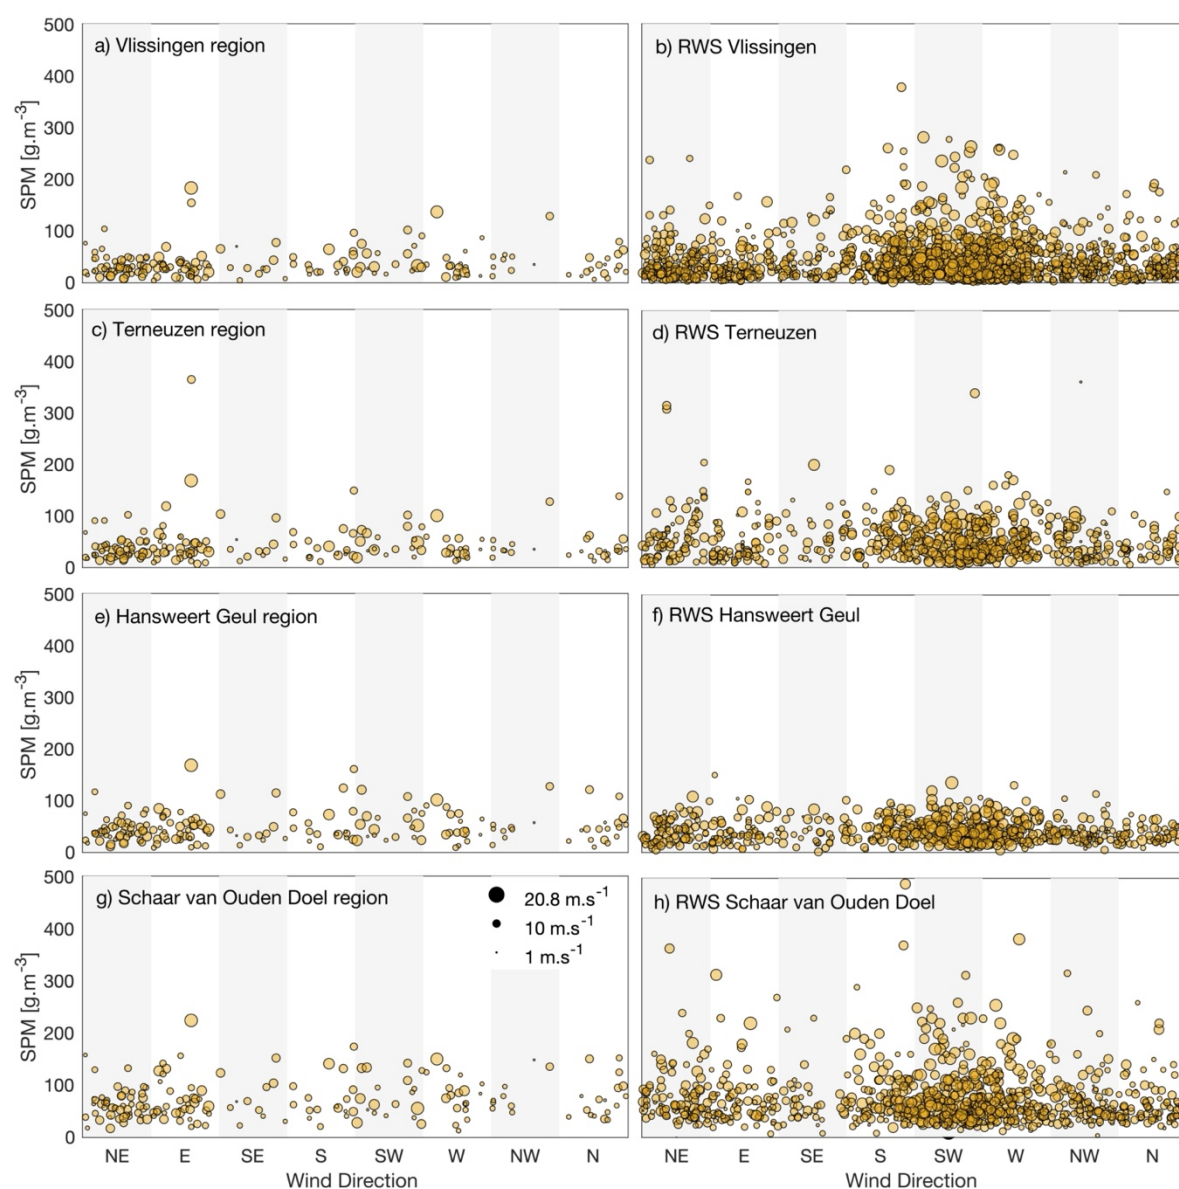

Figure S3 - Relationship between wind direction and SPM. Panels (a), (c), (e), (g) represent the median satellite-derived SPM in the delimited region (refer to Figure 1 in main text). Panels (b), (d), (f), (h) represent the RWS long-term SPM in situ stations. Shaded areas represent each of the eight wind directions: northeast (NE centered at 45°), east (E; centered at 90°), south-east (SE; centered at 135°), south (S; centered at 180°), south-west (SW; centered at 225°), north-west (NW; centered at 315°), and north (N; centered at 0° or 360°). Scatter size is proportional to wind speed.



## Supplementary Material S1: Band-weighted uncertainties in the NIR bands

The range of wavelengths from available hyperspectral narrow-band coefficients (i.e., Table 1 and Table 4 in reference [1]) in Equation 1 (see main text), do not cover the spectral limits of SRFs (Spectral Response Functions) in the Near-Infrared (NIR) of Landsat-5 (760-900nm), Landsat-7 (770-900nm) and Landsat-8 (829-900nm). Therefore, computed band-weighted coefficients (lacking the 885-900nm range) may introduce uncertainty to the SPM product, even though the band-weighted coefficients perform better than the narrow-band ones.

Reference [2] observed that uncertainties in coefficient  $C$  in Equation 1 have a negligible impact in SPM estimates while uncertainties in coefficient  $A$  translate as a linearly proportional misestimation in SPM due to the “settings” of the algorithm. Here, an uncertainty approximation for band-weighted coefficient  $A$  is computed based on a strong similarity between pure water absorption and the spectral curve of coefficient  $A$  (both normalized at 780nm) reported in reference [1]. With normalized pure water absorption equal to  $A$ , we computed the band-weighted  $A$  coefficient for each satellite sensor (1) in the full range of SRF (up until 900nm) and (2) limited by spectral range of the narrow band coefficients. Our extrapolated results in the NIR band show that band-weighted coefficient  $A$  is underestimated by 7.12% for Landsat-5, 6.26% for Landsat-7, and 0.03% for Landsat-8.

### References:

1. Nechad, B.; Ruddick, K.G.; Park, Y. Calibration and Validation of a Generic Multisensor Algorithm for Mapping of Total Suspended Matter in Turbid Waters. *Remote Sens. Environ.* **2010**, *114*, 854–866, doi:10.1016/j.rse.2009.11.022.
2. Nechad, B.; Ruddick, K.G.; Neukermans, G. Calibration and Validation of a Generic Multisensor Algorithm for Mapping of Turbidity in Coastal Waters. *Remote Sens. Ocean. Sea Ice, Large Water Reg.* **2009**, *2009*, 7473, 74730H, doi:10.1117/12.830700.
